# Supplementary material for: Cationic intermediates in Friedel–Crafts acylation: structural information from theory and experiment
Source: Royal Society of Chemistry journal article supplement (doi:10.1039/c0cc02286a), 2010-09-20
Supplement: c0cc02286a.pdf [file c0cc02286a.pdf]

## SUPPORTING INFORMATION

### Cationic Intermediates in Friedel-Crafts Acylation: Structural Information from Theory and Experiment

Hui Zhu and Matthew P. Meyer\*

University of California, Merced, School of Natural Sciences P.O. Box 2039,  
Merced, California 95343

mmeyer@ucmerced.edu

#### Table of Contents

|                                                                                              |    |
|----------------------------------------------------------------------------------------------|----|
| Synthesis of $d_3$ -xylene.....                                                              | 1  |
| Procedure for Measuring Intramolecular $^2\text{H}$ KIEs.....                                | 2  |
| Raw Data from Intramolecular $^2\text{H}$ KIE Experiments.....                               | 3  |
| Procedure for Measuring Intermolecular $^2\text{H}$ KIEs ( $d_6$ - vs $d_{10}$ -xylene)..... | 4  |
| Raw Data from Intermolecular $d_6$ - vs $d_{10}$ -xylene Competition.....                    | 5  |
| Procedure for Measuring Intermolecular $^2\text{H}$ KIEs ( $d_6$ -xylene vs xylene)...       | 6  |
| Raw Data from Intermolecular $d_6$ -xylene vs xylene Competition.....                        | 7  |
| Optimized Cationic Intermediate Structures.....                                              | 8  |
| $\eta^6$ - $\pi$ -complex (gas phase).....                                                   | 9  |
| $\eta^1$ - $\pi$ -complex (gas phase).....                                                   | 10 |
| $\sigma$ -complex (gas phase).....                                                           | 11 |
| xylene (gas phase).....                                                                      | 12 |
| $\eta^6$ - $\pi$ -complex (PCM).....                                                         | 13 |
| $\eta^1$ - $\pi$ -complex (PCM).....                                                         | 14 |
| $\sigma$ -complex (PCM).....                                                                 | 15 |
| xylene (PCM).....                                                                            | 16 |

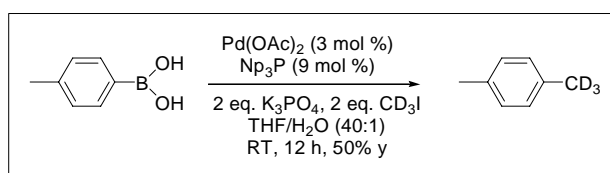

#### Synthesis of $d_3$ -Xylene

To a 250 mL RBF with a stir bar, 0.22 g (1.0 mmol) of palladium acetate, 0.96 g (2.3 mmol) of tri(1-naphthyl)phosphine, 4.5 g (33 mmol) of p-tolylboronic acid, 15.3g (66 mmol) of  $\text{K}_3\text{PO}_4 \cdot \text{H}_2\text{O}$ , 120 mL of THF and 3 mL of water were added. While stirring, 4 mL (9.6 g, 66 mmol) of  $d_3$ -iodomethane was added. The reaction was allowed to stir overnight – at which time the reaction mixture was poured into 500 mL of water. It was then extracted with 3  $\times$  200 mL pentane, and dried with anhydrous magnesium sulfate. The solution was then vacuum filtered and distilled. The distillate with a boiling range of 130-145°C was collected, weighed 1.8 g (50% yield), and identified as pure product by  $^1\text{H}$  NMR.

$^1\text{H}$  NMR (400MHz,  $\text{CDCl}_3$ )  $\delta$ : 7.075 (s,4H), 2.320 (s, 3H).

$^{13}\text{C}$  NMR (100MHz,  $\text{CDCl}_3$ )  $\delta$ : 134.886 (s,1C [C4]), 134.768 (s,1C [C1]), 129.107 (s,4C [C2,C3,C5,C6]), 21.195 (s,1C [CH<sub>3</sub>]), 20.205 (sept,1C [CD<sub>3</sub>])

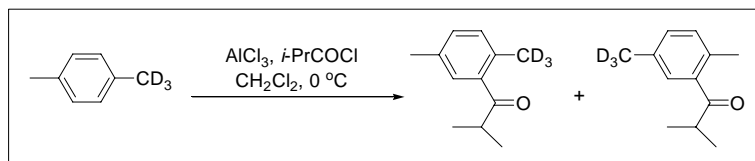

### Procedure for Measuring Intramolecular <sup>2</sup>H KIEs

**Intramolecular Competition Reaction.** A 100 mL 3-neck RBF was mounted with a 25 mL pressure-equalizing dropping funnel and a stir bar. The apparatus was dried by heating intensively with heat gun while purging with dry nitrogen gas. After the apparatus cooled to room temperature, 232  $\mu$ L (200 mg, 1.83 mmol, 1.0 eq) of *d*<sub>3</sub>-*p*-xylene was added to the RBF while purging with a stream of dry nitrogen. To the RBF, 20 mL of dry dichloromethane (Sigma-Aldrich, Sure/Seal™ bottle, used as-is) was transferred into the 3-neck RBF via cannula. The 3-neck RBF was then placed into an ice-water bath. The mixture was stirred for at least 15 minutes to ensure equilibration to 0 °C. Another 100 mL RBF with a stir bar was dried by heating intensively with heat gun while purging with dry nitrogen gas. After the apparatus cooled to room temperature, 1.13 g (1.72 mmol, 0.9 eq) of anhydrous aluminum chloride was added quickly, followed by the cannula transfer of 20 mL of dry dichloromethane (Sigma-Aldrich, Sure/Seal™ bottle, used as-is). With stirring, 0.17 mL (0.17g, 1.6 mmol, 0.85 eq) of redistilled isobutyryl chloride was injected into the slurry. The mixture was stirred under room temperature for 10 minutes. During this time, the isobutyryl chloride/AlCl<sub>3</sub> solution became translucent. The isobutyryl chloride/AlCl<sub>3</sub> solution was then transferred to the pressure-equalizing dropping funnel fitted to the 3-neck RBF containing the *d*<sub>3</sub>-*p*-xylene. The electrophile solution was added at a rate of one drop per second over a period of approximately 10 minutes. The reaction mixture was stirred at 0 °C for 2 hours. The reaction was then poured into a 125 mL separatory funnel charged with 50 mL of crushed ice. The separatory funnel was capped and shaken vigorously, and put aside until the aqueous and organic layers separated. The organic layer was recovered and collected, and the aqueous layer was extracted with 2  $\times$  50 mL of dichloromethane. The combined organic layers were dried with anhydrous magnesium sulfate. The dried solution was filtered, and the solvent was removed by rotary evaporation *in vacuo*.

**NMR Measurement and Calculation.** Approximately 100 mg of sample was dissolved in 0.75 mL of benzene-*d*<sub>6</sub> and filled to the 5.0 cm mark in a standard 5 mm NMR tube. <sup>2</sup>H NMR spectra were recorded at 61.364 MHz on a Varian Unity 400 MHz NMR using a sweep width (200.0 Hz - 10 times the difference between the 2'-CD<sub>3</sub> and 5'-CD<sub>3</sub> resonances). The sweep width was then centered about the two peaks of interest. A calibrated 90° pulse width and an acquisition time of 8.00 s were used to collect a total of 3200 points. A delay of 12.0 s (approximately 10 times the duration of the T<sub>1</sub> value for the longest relaxing methyl group) was used to ensure quantitative relative <sup>2</sup>H measurement. The peaks at  $\delta$  2.32 ppm (2'-CD<sub>3</sub>) and  $\delta$  1.99 ppm (5'-CD<sub>3</sub>) were integrated separately using an integration cut that was five times of their line widths (FWHM). The ratio of the integration of these peaks represents the intramolecular <sup>2</sup>H KIE. A weighted average was then applied to the individual KIE measurements according to a method reported by Mandel to yield a value of 1.043  $\pm$  0.002.<sup>1</sup>

1. Mandel, J *The Statistical Analysis of Experimental Data*, pp 132-135; Dover: Mineola, NY, 1984.

### Raw Data from Intramolecular <sup>2</sup>H KIE Experiments

**Table S1.** Average <sup>2</sup>H integrations with errors for isolated product.

| <b>Experiment 1</b>                                            |          |           |           |           |           |           |          |          |
|----------------------------------------------------------------|----------|-----------|-----------|-----------|-----------|-----------|----------|----------|
| <b>Spectrum</b>                                                | <b>1</b> | <b>2</b>  | <b>3</b>  | <b>4</b>  | <b>5</b>  | <b>6</b>  | <b>7</b> | <b>8</b> |
| <b>2'-CD<sub>3</sub> integration</b>                           | 960.37   | 958.84    | 960.82    | 962.98    | 960.86    | 960.56    | 962.49   | 960.17   |
| <b>5'-CD<sub>3</sub> integration</b>                           | 1000.00  | 1000.00   | 1000.00   | 1000.00   | 1000.00   | 1000.00   | 1000.00  | 1000.00  |
| <b>Spectrum</b>                                                | <b>9</b> | <b>10</b> | <b>11</b> | <b>12</b> | <b>13</b> | <b>14</b> |          |          |
| <b>2'-CD<sub>3</sub> integration</b>                           | 947.56   | 952.76    | 956.36    | 954.47    | 972.31    | 959.86    |          |          |
| <b>5'-CD<sub>3</sub> integration</b>                           | 1000.00  | 1000.00   | 1000.00   | 1000.00   | 1000.00   | 1000.00   |          |          |
| <b>[5'-CD<sub>3</sub>]/[2'-CD<sub>3</sub>] = 1.042 ± 0.006</b> |          |           |           |           |           |           |          |          |
| <b>Experiment 2</b>                                            |          |           |           |           |           |           |          |          |
| <b>Spectrum</b>                                                | <b>1</b> | <b>2</b>  | <b>3</b>  | <b>4</b>  | <b>5</b>  | <b>6</b>  | <b>7</b> | <b>8</b> |
| <b>2'-CD<sub>3</sub> integration</b>                           | 955.92   | 966.12    | 965.80    | 954.87    | 986.90    | 987.36    | 988.52   | 985.70   |
| <b>5'-CD<sub>3</sub> integration</b>                           | 1000.00  | 1000.00   | 1000.00   | 1000.00   | 1000.00   | 1000.00   | 1000.00  | 1000.00  |
| <b>Spectrum</b>                                                | <b>9</b> | <b>10</b> |           |           |           |           |          |          |
| <b>2'-CD<sub>3</sub> integration</b>                           | 985.47   | 988.66    |           |           |           |           |          |          |
| <b>5'-CD<sub>3</sub> integration</b>                           | 1000.00  | 1000.00   |           |           |           |           |          |          |
| <b>[5'-CD<sub>3</sub>]/[2'-CD<sub>3</sub>] = 1.023 ± 0.015</b> |          |           |           |           |           |           |          |          |
| <b>Experiment 3</b>                                            |          |           |           |           |           |           |          |          |
| <b>Spectrum</b>                                                | <b>1</b> | <b>2</b>  | <b>3</b>  | <b>4</b>  | <b>5</b>  | <b>6</b>  |          |          |
| <b>2'-CD<sub>3</sub> integration</b>                           | 967.15   | 951.46    | 962.71    | 959.33    | 964.10    | 959.68    |          |          |
| <b>5'-CD<sub>3</sub> integration</b>                           | 1000.00  | 1000.00   | 1000.00   | 1000.00   | 1000.00   | 1000.00   |          |          |
| <b>[5'-CD<sub>3</sub>]/[2'-CD<sub>3</sub>] = 1.041 ± 0.006</b> |          |           |           |           |           |           |          |          |
| <b>Experiment 4</b>                                            |          |           |           |           |           |           |          |          |
| <b>Spectrum</b>                                                | <b>1</b> | <b>2</b>  | <b>3</b>  | <b>4</b>  | <b>5</b>  | <b>6</b>  |          |          |
| <b>2'-CD<sub>3</sub> integration</b>                           | 956.37   | 958.34    | 955.78    | 960.85    | 961.80    | 956.48    |          |          |
| <b>5'-CD<sub>3</sub> integration</b>                           | 1000.00  | 1000.00   | 1000.00   | 1000.00   | 1000.00   | 1000.00   |          |          |
| <b>[5'-CD<sub>3</sub>]/[2'-CD<sub>3</sub>] = 1.044 ± 0.003</b> |          |           |           |           |           |           |          |          |

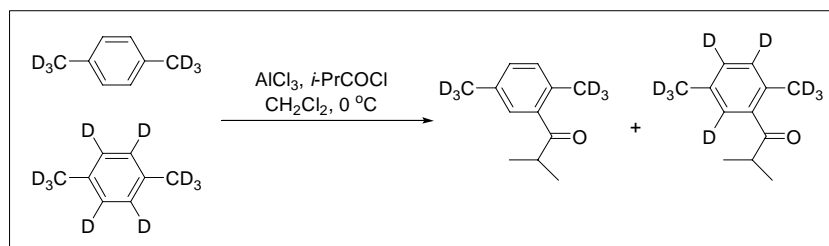

### Procedure for Measuring Intermolecular <sup>2</sup>H KIEs (*d*<sub>6</sub>- vs *d*<sub>10</sub>-xylene)

**Competition Reaction Experiment.** The acylation for the intermolecular KIE measurement of the deprotonation step was performed identically with that for intramolecular KIE measurement, except an approximately 1:1 mixture of *d*<sub>10</sub>-*p*-xylene- and *d*<sub>6</sub>-*p*-xylene served as the aromatic substrate. After drying the extracted mixture of unreacted starting material and converted product, the removal of solvent dichloromethane was accomplished using gentle distillation. In this distillation process, a water bath at 70 °C was utilized to limit the distillation rate in order to preserve the unreacted *d*<sub>10</sub>-*p*-xylene- and *d*<sub>6</sub>-*p*-xylene (bp ~133 °C) in the reaction mixture.

#### NMR Measurement and Calculation.

The sample was dissolved in 0.75 mL of CD<sub>2</sub>Cl<sub>2</sub> and filled to the 5.0 cm mark in a standard 5 mm NMR tube.

<sup>1</sup>H NMR spectra were recorded at 399.754 MHz using a Varian Unity 400 MHz instrument. A sweep width of 408.2 Hz was utilized with the spectral features of interest centered. An acquisition time of 16.00 s was used to collect a total of 13062 points. A delay of 60.0 s (>5 × T<sub>1</sub> based on an inversion recovery experiment) was used to ensure quantitative <sup>1</sup>H integrations. After acquisition, the spectrum was phased properly and a zero order correction was applied to the baseline. The singlet at δ 7.34 ppm (6'-H from product) and the singlet at δ 7.09 ppm (Ar-H, 4H, from reactant) were integrated separately using an integral cut of five times of their line widths (FWHM). The percent conversion (*F*<sub>H</sub>) of *p*-xylene-*dimethyl-d*<sub>6</sub> was calculated and recorded.

<sup>2</sup>H NMR spectra were recorded at 92.278 MHz using a Bruker Avance 600 MHz instrument. A sweep width of 992.7 Hz was utilized with the spectral features of interest centered. An acquisition time of 6.00 s was used to collect a total of 11072 points. A delay of 3.0 s (>5 × T<sub>1</sub> based on an inversion recovery experiment) was used to ensure quantitative <sup>2</sup>H integrations. After acquisition, the spectrum was phased properly and a zero-order correction was applied to the baseline. The integrations of the singlet at δ 7.63 ppm (6'-D from product) and the singlet at δ 7.38 ppm (Ar-D, 4D, from reactant) were obtained using deconvolution with a mixed Gaussian-Lorentzian peak shape. The percent conversion (*F*<sub>D</sub>) of *p*-xylene-*d*<sub>10</sub> was calculated and recorded. The <sup>2</sup>H KIE was computed using eq. S1. A weighted average was then applied to the individual KIE measurements according to a method reported by Mandel to yield a value of 1.010 ± 0.007.<sup>1</sup>

$$KIE = \frac{k_H}{k_D} = \frac{\ln(1 - F_H)}{\ln(1 - F_D)} \quad (\text{S1})$$

### Raw Data from Intermolecular $d_6$ - vs $d_{10}$ -xylene Competition

Table S2. Integrations ( $^1\text{H}$  and  $^2\text{H}$ ) from which  $F_H$  and  $F_D$  are computed.

| Experiment 1                          |          |          |          |          |          |          |          |          |
|---------------------------------------|----------|----------|----------|----------|----------|----------|----------|----------|
| $^1\text{H}$<br>Spectrum              | 1        | 2        | 3        | 4        | 5        | 6        |          |          |
| aryl (4H)<br><i>p</i> -xylene         | 709.12   | 706.205  | 708.986  | 714.356  | 721.611  | 727.455  |          |          |
| $6^1\text{-H}$<br>product             | 56.128   | 56.069   | 55.962   | 55.881   | 55.794   | 56.151   |          |          |
| $F_H=0.239$<br>$\pm 0.002$            | 0.240472 | 0.241032 | 0.239966 | 0.238329 | 0.236218 | 0.235914 |          |          |
| $^2\text{H}$<br>Spectrum              | 1        | 2        | 3        | 4        | 5        | 6        | 7        | 8        |
| aryl (4D)<br><i>p</i> -xylene         | 6.822    | 5.239    | 4.525    | 5.513    | 4.813    | 4.903    | 4.672    | 4.548    |
| $6^1\text{-D}$<br>product             | 0.522    | 0.402    | 0.347    | 0.423    | 0.369    | 0.376    | 0.358    | 0.35     |
| $F_D=0.2348$<br>$\pm 0.0003$          | 0.234343 | 0.234847 | 0.234737 | 0.234837 | 0.234696 | 0.234743 | 0.2346   | 0.235373 |
| <b>KIE=1.019<math>\pm</math>0.011</b> |          |          |          |          |          |          |          |          |
| Experiment 2                          |          |          |          |          |          |          |          |          |
| $^1\text{H}$<br>Spectrum              | 1        | 2        | 3        | 4        |          |          |          |          |
| aryl (4H)<br><i>p</i> -xylene         | 28.63    | 28.48    | 28.14    | 28.14    |          |          |          |          |
| $6^1\text{-H}$<br>product             | 400.00   | 400.00   | 400.00   | 400.00   |          |          |          |          |
| $F_H=0.221$<br>$\pm 0.002$            | 0.222576 | 0.221669 | 0.219604 | 0.219604 |          |          |          |          |
| $^2\text{H}$<br>Spectrum              | 1        | 2        | 3        | 4        | 5        | 6        | 7        | 8        |
| aryl (4D)<br><i>p</i> -xylene         | 19.55    | 8.969    | 10.259   | 10.529   | 12.113   | 14.62    | 11.283   | 13.821   |
| $6^1\text{-D}$<br>product             | 1.415    | 0.652    | 0.74     | 0.751    | 0.84     | 1.044    | 0.795    | 0.951    |
| $F_D=0.221$<br>$\pm 0.003$            | 0.224514 | 0.225274 | 0.22392  | 0.221976 | 0.217152 | 0.222175 | 0.219871 | 0.21583  |
| <b>KIE=0.998<math>\pm</math>0.010</b> |          |          |          |          |          |          |          |          |
| Experiment 3                          |          |          |          |          |          |          |          |          |
| $^1\text{H}$<br>Spectrum              | 1        | 2        | 3        | 4        | 5        | 6        | 7        | 8        |
| aryl (4H)<br><i>p</i> -xylene         | 400.00   | 400.00   | 400.00   | 400.0    | 400.00   | 400.00   | 400.00   | 400.00   |
| $6^1\text{-H}$<br>product             | 26.65    | 27.05    | 26.87    | 27.22    | 27.1     | 26.84    | 26.49    | 26.42    |
| $F_H=0.212$<br>$\pm 0.002$            | 0.210422 | 0.212908 | 0.211792 | 0.21396  | 0.213218 | 0.211605 | 0.209424 | 0.208986 |
| $^2\text{H}$<br>Spectrum              | 1        | 2        | 3        | 4        | 5        | 6        | 7        | 8        |
| aryl (4D)<br><i>p</i> -xylene         | 28.495   | 29.909   | 30.929   | 34.191   | 30.457   | 35.477   | 32.218   | 30.746   |
| $6^1\text{-D}$<br>product             | 1.909    | 1.99     | 2.052    | 2.284    | 2.024    | 2.356    | 2.144    | 2.046    |
| $F_D=0.2103$<br>$\pm 0.0005$          | 0.211342 | 0.210198 | 0.209725 | 0.210862 | 0.209997 | 0.209884 | 0.210227 | 0.210223 |
| <b>KIE=1.007<math>\pm</math>0.010</b> |          |          |          |          |          |          |          |          |

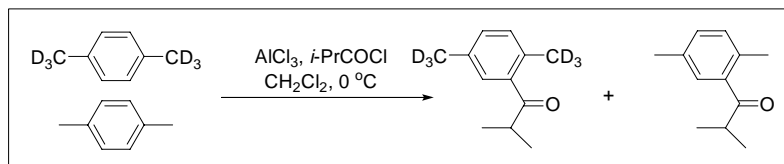

### Procedure for Measuring Intermolecular $^2\text{H}$ KIEs ( $d_6$ -xylene vs xylene)

**Competition Reaction Experiment.** The acylation for the intermolecular KIE measurement resulting in fractionation of  $d_6$ -p-xylene and p-xylene was performed identically with that used for the intramolecular KIE measurement, except an approximately 1:1 mixture of  $d_6$ -p-xylene- and p-xylene served as the aromatic substrate. After drying the extracted mixture of unreacted starting material and converted product, the removal of solvent dichloromethane was accomplished using gentle distillation. In this distillation process, a water bath at  $70\text{ }^\circ\text{C}$  was utilized to limit the distillation rate in order to preserve the unreacted  $d_6$ -p-xylene- and p-xylene (bp  $\sim 133\text{ }^\circ\text{C}$ ) in the reaction mixture.

#### NMR Measurement and Calculation.

The sample was dissolved in 0.75 mL of  $\text{CD}_2\text{Cl}_2$  and filled to the 5.0 cm mark in a standard 5 mm NMR tube.

$^1\text{H}$  NMR spectra were recorded at 399.753 MHz using a Varian Unity 400 MHz instrument. A sweep width of 6387.7 Hz was utilized with the spectral features of interest centered. An acquisition time of 16.00 s was used to collect a total of 204408 points. A delay of 84.0 s ( $>5 \times T_1$  based on an inversion recovery experiment) was used to ensure quantitative  $^1\text{H}$  integrations. After acquisition, the spectrum was phased properly, and a zero order correction was applied to the baseline. The doublet centered at  $\delta$  2.34 ppm ( $2'$ - and  $5'$ - $\text{CH}_3$  from product) and the singlet at  $\delta$  2.29 ppm (methyl groups from reactant) were integrated separately using an integral cut of five times of their line widths (FWHM). These integrations were used to compute the fractional conversion ( $F_{\text{H}}$ ) of p-xylene.

$^2\text{H}$  NMR spectra were recorded at 61.364 MHz using a Varian Unity 400 MHz instrument. A sweep width of 200.0 Hz was utilized with the spectral features of interest centered. An acquisition time of 6.00 s was used to collect a total of 11072 points. A delay of 20.0 s was used to ensure quantitative  $^2\text{H}$  integrations. After acquisition, the spectrum was phased properly and zeroth order correction was applied to the baseline. The two resonances centered at  $\delta$  2.32 ppm ( $2'$ - and  $5'$ - $\text{CD}_3$  from product) and the singlet at  $\delta$  2.27 ppm (deuterated methyl groups from reactant) were integrated separately using an integral cut of three times their line widths (FWHM). In Table S3, the integrations for the  $2'$ - and  $5'$ -methyl groups are combined. These integrations were used to compute the fractional conversion ( $F_{\text{D}}$ ) of  $d_6$ -p-xylene. The  $^2\text{H}$  KIE was computed using eq. S1. A weighted average was then applied to the individual KIE measurements according to a method reported by Mandel to yield a value of  $0.949 \pm 0.004$ .<sup>1</sup>

### Raw Data from Intermolecular *d*<sub>6</sub>-*p*-xylene vs *p*-xylene Competition

Table S3. Integrations (<sup>1</sup>H and <sup>2</sup>H) from which *F<sub>H</sub>* and *F<sub>D</sub>* are computed.

| Experiment 1                            |           |           |           |           |           |           |
|-----------------------------------------|-----------|-----------|-----------|-----------|-----------|-----------|
| <sup>1</sup> H Spectrum                 | 1         | 2         | 3         | 4         | 5         | 6         |
| 1,4-(CH <sub>3</sub> ) <sub>2</sub>     | 1000.00   | 1000.00   | 1000.00   | 1000.00   | 1000.00   | 1000.00   |
| 2',5'-CH <sub>3</sub>                   | 244.43    | 241.61    | 247.4     | 245.63    | 245.56    | 245.06    |
| <i>F<sub>H</sub></i> =0.197<br>±0.001   | 0.19641   | 0.19459   | 0.19833   | 0.19719   | 0.19714   | 0.19682   |
| <sup>2</sup> H Spectrum                 | 1         | 2         | 3         | 4         | 5         | 6         |
| 1,4-(CD <sub>3</sub> ) <sub>2</sub>     | 264.83    | 266.23    | 267.81    | 263.34    | 260.22    | 259.64    |
| 2',5'-CD <sub>3</sub>                   | 1000.00   | 1000.00   | 1000.00   | 1000.00   | 1000.00   | 1000.00   |
| <i>F<sub>D</sub></i> =0.209<br>±0.002   | 0.20938   | 0.21025   | 0.21124   | 0.20845   | 0.20649   | 0.20612   |
| <b>KIE = 0.936 ± 0.012</b>              |           |           |           |           |           |           |
| Experiment 2                            |           |           |           |           |           |           |
| <sup>1</sup> H Spectrum                 | 1         | 2         | 3         | 4         | 5         | 6         |
| 1,4-(CH <sub>3</sub> ) <sub>2</sub>     | 1000.00   | 1000.00   | 1000.00   | 1000.00   | 1000.00   | 1000.00   |
| 2',5'-CH <sub>3</sub>                   | 286.40    | 286.13    | 286.06    | 286.57    | 286.73    | 285.37    |
| <i>F<sub>H</sub></i> =0.2225<br>±0.0003 | 0.22264   | 0.22247   | 0.22243   | 0.22274   | 0.22284   | 0.22201   |
| <sup>2</sup> H Spectrum                 | 1         | 2         | 3         | 4         | 5         | 6         |
| 1,4-(CH <sub>3</sub> ) <sub>2</sub>     | 306.13    | 305.56    | 300.13    | 300.3     | 303.26    | 298.44    |
| 2',5'-CH <sub>3</sub>                   | 1000.00   | 1000.00   | 1000.00   | 1000.00   | 1000.00   | 1000.00   |
| <i>F<sub>D</sub></i> =0.232<br>±0.002   | 0.23438   | 0.23405   | 0.23085   | 0.23095   | 0.23269   | 0.22985   |
| <b>KIE = 0.953 ± 0.009</b>              |           |           |           |           |           |           |
| Experiment 3                            |           |           |           |           |           |           |
| <sup>1</sup> H Spectrum                 | 1         | 2         | 3         | 4         | 5         | 6         |
| 1,4-(CH <sub>3</sub> ) <sub>2</sub>     | 1000.00   | 1000.00   | 1000.00   | 1000.00   | 1000.00   | 1000.00   |
| 2',5'-CH <sub>3</sub>                   | 1840.73   | 1838.42   | 1841.14   | 1855.75   | 1854.1    | 1849.04   |
| <i>F<sub>H</sub></i> =0.6487<br>±0.0009 | 0.647978  | 0.647691  | 0.648029  | 0.649829  | 0.649627  | 0.649005  |
| <sup>2</sup> H Spectrum                 | 1         | 2         | 3         | 4         | 5         | 6         |
| 1,4-(CH <sub>3</sub> ) <sub>2</sub>     | 1984.59   | 2010.34   | 2011.4    | 2013.2    | 2012.8    | 1991.25   |
| 2',5'-CH <sub>3</sub>                   | 1000.00   | 1000.00   | 1000.00   | 1000.00   | 1000.00   | 1000.00   |
| <i>F<sub>D</sub></i> =0.667<br>±0.001   | 0.664946  | 0.667812  | 0.667929  | 0.668127  | 0.668083  | 0.6656916 |
| <b>KIE = 0.951 ± 0.004</b>              |           |           |           |           |           |           |
| Experiment 4                            |           |           |           |           |           |           |
| <sup>1</sup> H Spectrum                 | 1         | 2         | 3         | 4         | 5         | 6         |
| 1,4-(CH <sub>3</sub> ) <sub>2</sub>     | 1000.00   | 1000.00   | 1000.00   | 1000.00   | 1000.00   | 1000.00   |
| 2',5'-CH <sub>3</sub>                   | 381.57    | 382.37    | 380.76    | 381.77    | 385.44    | 384.51    |
| <i>F<sub>H</sub></i> =0.277<br>±0.001   | 0.27619   | 0.27660   | 0.27576   | 0.27629   | 0.27821   | 0.27772   |
| <sup>2</sup> H Spectrum                 | 1         | 2         | 3         | 4         | 5         | 6         |
| 1,4-(CH <sub>3</sub> ) <sub>2</sub>     | 405.29    | 413.42    | 407.57    | 407.25    | 417.39    |           |
| 2',5'-CH <sub>3</sub>                   | 1000.00   | 1000.00   | 1000.00   | 1000.00   | 1000.00   |           |
| <i>F<sub>D</sub></i> =0.291<br>±0.002   | 0.2884031 | 0.2924962 | 0.2895558 | 0.2893942 | 0.2944779 |           |
| <b>KIE = 0.943 ± 0.010</b>              |           |           |           |           |           |           |

### Computed Structures

All quantum mechanical calculations were performed with Gaussian09.<sup>1</sup> All structures were fully optimized using the M06-2X hybrid functional together with the 6-31+G(d,p) basis set.

Solvent effects (dichloromethane) in the computed geometries and frequencies were taken into account by means of the IEFPCM solvation model as implemented in Gaussian09. All IEFPCM calculations were carried out at the M06-2X/6-31+G(d,p) level of theory. The solute cavities were generated using the United Atom Topological Model UAO set of radii.

1. Gaussian 09, Revision A.1, M. J. Frisch, G. W. Trucks, H. B. Schlegel, G. E. Scuseria, M. A. Robb, J. R. Cheeseman, G. Scalmani, V. Barone, B. Mennucci, G. A. Petersson, H. Nakatsuji, M. Caricato, X. Li, H. P. Hratchian, A. F. Izmaylov, J. Bloino, G. Zheng, J. L. Sonnenberg, M. Hada, M. Ehara, K. Toyota, R. Fukuda, J. Hasegawa, M. Ishida, T. Nakajima, Y. Honda, O. Kitao, H. Nakai, T. Vreven, J. A. Montgomery, Jr., J. E. Peralta, F. Ogliaro, M. Bearpark, J. J. Heyd, E. Brothers, K. N. Kudin, V. N. Staroverov, R. Kobayashi, J. Normand, K. Raghavachari, A. Rendell, J. C. Burant, S. S. Iyengar, J. Tomasi, M. Cossi, N. Rega, J. M. Millam, M. Klene, J. E. Knox, J. B. Cross, V. Bakken, C. Adamo, J. Jaramillo, R. Gomperts, R. E. Stratmann, O. Yazyev, A. J. Austin, R. Cammi, C. Pomelli, J. W. Ochterski, R. L. Martin, K. Morokuma, V. G. Zakrzewski, G. A. Voth, P. Salvador, J. J. Dannenberg, S. Dapprich, A. D. Daniels, Ö. Farkas, J. B. Foresman, J. V. Ortiz, J. Cioslowski, and D. J. Fox, Gaussian, Inc., Wallingford CT, 2009.



**$\eta^6$ - $\pi$ -complex (gas phase)**

E(RM062X) = -542.238874007

|                                              |             |
|----------------------------------------------|-------------|
| Zero-point correction=                       | 0.261239    |
| (Hartree/Particle)                           |             |
| Thermal correction to Energy=                | 0.276626    |
| Thermal correction to Enthalpy=              | 0.277570    |
| Thermal correction to Gibbs Free Energy=     | 0.217536    |
| Sum of electronic and zero-point Energies=   | -541.977635 |
| Sum of electronic and thermal Energies=      | -541.962248 |
| Sum of electronic and thermal Enthalpies=    | -541.961304 |
| Sum of electronic and thermal Free Energies= | -542.021338 |

|       |   | E (Thermal) |           | CV             | S              |
|-------|---|-------------|-----------|----------------|----------------|
|       |   | KCal/Mol    |           | Cal/Mol-Kelvin | Cal/Mol-Kelvin |
| Total |   | 173.585     |           | 55.210         | 126.352        |
| C     | 0 | 2.619048    | -0.677784 | 1.355691       |                |
| H     | 0 | 2.200802    | 0.318261  | 1.495297       |                |
| H     | 0 | 2.236827    | -1.347795 | 2.127449       |                |
| H     | 0 | 3.706152    | -0.626896 | 1.443773       |                |
| C     | 0 | 2.314111    | -1.192417 | -0.062603      |                |
| H     | 0 | 2.733700    | -2.204714 | -0.189149      |                |
| C     | 0 | 2.811073    | -0.277236 | -1.198340      |                |
| H     | 0 | 2.578072    | -0.682476 | -2.184382      |                |
| H     | 0 | 2.383363    | 0.719437  | -1.097066      |                |
| H     | 0 | 3.896249    | -0.212787 | -1.095417      |                |
| C     | 0 | 0.889680    | -1.473404 | -0.224819      |                |
| C     | 0 | -1.849359   | 0.394961  | -1.132655      |                |
| C     | 0 | -2.349320   | -0.142693 | 0.061370       |                |
| C     | 0 | -0.710657   | 1.196339  | -1.142128      |                |
| C     | 0 | -1.658599   | 0.137922  | 1.246555       |                |
| C     | 0 | -0.033612   | 1.503419  | 0.048286       |                |
| H     | 0 | -0.373716   | 1.639434  | -2.076712      |                |
| C     | 0 | -0.516925   | 0.936524  | 1.241352       |                |
| H     | 0 | -2.033139   | -0.254670 | 2.188440       |                |
| O     | 0 | -0.127925   | -1.915501 | -0.394051      |                |
| H     | 0 | -0.037051   | 1.188718  | 2.185277       |                |
| C     | 0 | -3.578868   | -1.011558 | 0.062606       |                |
| H     | 0 | -3.323314   | -2.047619 | -0.187323      |                |
| H     | 0 | -4.059971   | -1.015607 | 1.042854       |                |
| H     | 0 | -4.305513   | -0.665686 | -0.676030      |                |
| C     | 0 | 1.041231    | 2.562372  | 0.074724       |                |
| H     | 0 | 1.851732    | 2.333451  | 0.773886       |                |
| H     | 0 | 1.470193    | 2.734191  | -0.916087      |                |
| H     | 0 | 0.604997    | 3.511666  | 0.402392       |                |
| H     | 0 | -2.372795   | 0.198432  | -2.065029      |                |

**$\eta^1$ - $\pi$ -complex (gas phase)**

SCF Done: E(RM062X) = -542.236964346

|                                              |             |
|----------------------------------------------|-------------|
| Zero-point correction=                       | 0.260940    |
| (Hartree/Particle)                           |             |
| Thermal correction to Energy=                | 0.275592    |
| Thermal correction to Enthalpy=              | 0.276536    |
| Thermal correction to Gibbs Free Energy=     | 0.219259    |
| Sum of electronic and zero-point Energies=   | -541.976024 |
| Sum of electronic and thermal Energies=      | -541.961372 |
| Sum of electronic and thermal Enthalpies=    | -541.960428 |
| Sum of electronic and thermal Free Energies= | -542.017705 |

|       |   | E (Thermal) | CV             | S              |
|-------|---|-------------|----------------|----------------|
|       |   | KCal/Mol    | Cal/Mol-Kelvin | Cal/Mol-Kelvin |
| Total |   | 172.937     | 53.263         | 120.550        |
| C     | 0 | -0.961967   | -1.106813      | 1.662493       |
| H     | 0 | 0.012617    | -0.893361      | 1.222011       |
| H     | 0 | -1.255827   | -0.289619      | 2.323278       |
| H     | 0 | -0.904657   | -2.027665      | 2.246463       |
| C     | 0 | -1.997650   | -1.361758      | 0.550867       |
| H     | 0 | -2.977455   | -1.623500      | 0.987447       |
| C     | 0 | -1.570770   | -2.440747      | -0.468824      |
| H     | 0 | -2.311889   | -2.588087      | -1.255843      |
| H     | 0 | -0.603405   | -2.181635      | -0.900652      |
| H     | 0 | -1.471927   | -3.370756      | 0.094721       |
| C     | 0 | -2.343528   | -0.129257      | -0.140882      |
| C     | 0 | 0.289400    | 0.787180       | -1.145944      |
| C     | 0 | 0.301792    | 1.687751       | -0.073426      |
| C     | 0 | 1.219575    | -0.258018      | -1.225474      |
| C     | 0 | 1.267262    | 1.494332       | 0.927411       |
| C     | 0 | 2.183308    | -0.441936      | -0.233922      |
| H     | 0 | 1.219614    | -0.907197      | -2.098458      |
| C     | 0 | 2.187896    | 0.456857       | 0.845525       |
| H     | 0 | 1.314480    | 2.189207       | 1.762506       |
| O     | 0 | -2.802718   | 0.764181       | -0.641589      |
| H     | 0 | 2.940154    | 0.347197       | 1.622914       |
| C     | 0 | -0.620260   | 2.881317       | -0.025902      |
| H     | 0 | -1.254739   | 2.874321       | 0.867858       |
| H     | 0 | -0.039429   | 3.807335       | 0.007669       |
| H     | 0 | -1.260903   | 2.933426       | -0.909710      |
| C     | 0 | 3.206617    | -1.544530      | -0.315407      |
| H     | 0 | 3.082983    | -2.259602      | 0.504284       |
| H     | 0 | 3.131047    | -2.090071      | -1.258149      |
| H     | 0 | 4.218772    | -1.137594      | -0.240637      |
| H     | 0 | -0.387749   | 0.957884       | -1.982093      |

**$\sigma$ -complex (gas phase)**

SCF Done: E(RM062X) = -542.233849762

|                                              |             |
|----------------------------------------------|-------------|
| Zero-point correction=                       | 0.261940    |
| (Hartree/Particle)                           |             |
| Thermal correction to Energy=                | 0.276452    |
| Thermal correction to Enthalpy=              | 0.277397    |
| Thermal correction to Gibbs Free Energy=     | 0.220895    |
| Sum of electronic and zero-point Energies=   | -541.971909 |
| Sum of electronic and thermal Energies=      | -541.957397 |
| Sum of electronic and thermal Enthalpies=    | -541.956453 |
| Sum of electronic and thermal Free Energies= | -542.012955 |

|       |   | E (Thermal) | CV             | S              |
|-------|---|-------------|----------------|----------------|
|       |   | KCal/Mol    | Cal/Mol-Kelvin | Cal/Mol-Kelvin |
| Total |   | 173.477     | 53.951         | 118.918        |
| C     | 0 | -0.807295   | -1.083429      | 1.817963       |
| H     | 0 | 0.253216    | -0.869428      | 1.669036       |
| H     | 0 | -1.291929   | -0.210714      | 2.264688       |
| H     | 0 | -0.882598   | -1.907298      | 2.532364       |
| C     | 0 | -1.475641   | -1.513594      | 0.510248       |
| H     | 0 | -2.520188   | -1.780978      | 0.704548       |
| C     | 0 | -0.778500   | -2.713883      | -0.138379      |
| H     | 0 | -1.160416   | -2.924102      | -1.140951      |
| H     | 0 | 0.305766    | -2.583916      | -0.180927      |
| H     | 0 | -0.974064   | -3.592605      | 0.481386       |
| C     | 0 | -1.637101   | -0.330730      | -0.427453      |
| C     | 0 | -0.225461   | 0.542309       | -0.953777      |
| C     | 0 | -0.178279   | 1.691078       | -0.052832      |
| C     | 0 | 0.961424    | -0.288538      | -1.070984      |
| C     | 0 | 0.945034    | 1.847777       | 0.749494       |
| C     | 0 | 2.067914    | -0.106684      | -0.279517      |
| H     | 0 | 0.961427    | -1.061964      | -1.835704      |
| C     | 0 | 2.030104    | 0.981510       | 0.630182       |
| H     | 0 | 1.000300    | 2.683385       | 1.440263       |
| O     | 0 | -2.649374   | 0.117170       | -0.834273      |
| H     | 0 | 2.906368    | 1.162017       | 1.250968       |
| C     | 0 | -1.314302   | 2.660321       | 0.005412       |
| H     | 0 | -2.101690   | 2.281484       | 0.669881       |
| H     | 0 | -0.978020   | 3.618104       | 0.405835       |
| H     | 0 | -1.770625   | 2.813075       | -0.973859      |
| C     | 0 | 3.290572    | -0.977144      | -0.373785      |
| H     | 0 | 3.466643    | -1.496595      | 0.573147       |
| H     | 0 | 3.181299    | -1.726800      | -1.159393      |
| H     | 0 | 4.178870    | -0.378799      | -0.593531      |
| H     | 0 | -0.650176   | 0.783825       | -1.932997      |

**xylene (gas phase)**

SCF Done: E(RM062X) = -310.749750401

|                                              |             |
|----------------------------------------------|-------------|
| Zero-point correction=                       | 0.156243    |
| (Hartree/Particle)                           |             |
| Thermal correction to Energy=                | 0.164272    |
| Thermal correction to Enthalpy=              | 0.165216    |
| Thermal correction to Gibbs Free Energy=     | 0.122879    |
| Sum of electronic and zero-point Energies=   | -310.593507 |
| Sum of electronic and thermal Energies=      | -310.585479 |
| Sum of electronic and thermal Enthalpies=    | -310.584535 |
| Sum of electronic and thermal Free Energies= | -310.626871 |

|       |   | E (Thermal) |           | CV             | S              |
|-------|---|-------------|-----------|----------------|----------------|
|       |   | KCal/Mol    |           | Cal/Mol-Kelvin | Cal/Mol-Kelvin |
| Total |   | 103.082     |           | 29.212         | 89.105         |
| C     | 0 | -1.417429   | 0.002110  | 0.013038       |                |
| C     | 0 | -0.695872   | -1.195707 | 0.007408       |                |
| C     | 0 | 0.695873    | -1.195708 | -0.007418      |                |
| C     | 0 | 1.417429    | 0.002109  | -0.013028      |                |
| C     | 0 | 0.697016    | 1.197979  | -0.007471      |                |
| C     | 0 | -0.697015   | 1.197979  | 0.007461       |                |
| H     | 0 | -1.232881   | -2.141561 | 0.013090       |                |
| H     | 0 | 1.232880    | -2.141563 | -0.013119      |                |
| H     | 0 | 1.233231    | 2.144065  | -0.013317      |                |
| H     | 0 | -1.233230   | 2.144066  | 0.013288       |                |
| C     | 0 | 2.925488    | -0.002412 | 0.005088       |                |
| H     | 0 | 3.304038    | -0.127428 | 1.025335       |                |
| H     | 0 | 3.325753    | -0.822387 | -0.597648      |                |
| H     | 0 | 3.328316    | 0.935502  | -0.385685      |                |
| C     | 0 | -2.925489   | -0.002413 | -0.005077      |                |
| H     | 0 | -3.328316   | 0.935483  | 0.385742       |                |
| H     | 0 | -3.304054   | -0.127384 | -1.025323      |                |
| H     | 0 | -3.325743   | -0.822413 | 0.597630       |                |

**$\eta^6$ - $\pi$ -complex (PCM)**

SCF Done: E(RM062X) = -542.305880156

Zero-point correction= 0.261071  
(Hartree/Particle)  
Thermal correction to Energy= 0.276541  
Thermal correction to Enthalpy= 0.277485  
Thermal correction to Gibbs Free Energy= 0.216688  
Sum of electronic and zero-point Energies= -542.044809  
Sum of electronic and thermal Energies= -542.029339  
Sum of electronic and thermal Enthalpies= -542.028395  
Sum of electronic and thermal Free Energies= -542.089192

|       |   | E (Thermal) |           | CV             | S              |
|-------|---|-------------|-----------|----------------|----------------|
| Total |   | KCal/Mol    |           | Cal/Mol-Kelvin | Cal/Mol-Kelvin |
|       |   | 173.532     |           | 55.207         | 127.957        |
| C     | 0 | 2.619643    | -0.593587 | 1.359200       |                |
| H     | 0 | 2.128127    | 0.374780  | 1.445120       |                |
| H     | 0 | 2.286461    | -1.250446 | 2.162866       |                |
| H     | 0 | 3.699345    | -0.457030 | 1.436779       |                |
| C     | 0 | 2.360999    | -1.204809 | -0.031756      |                |
| H     | 0 | 2.855411    | -2.186105 | -0.112118      |                |
| C     | 0 | 2.781193    | -0.302255 | -1.209066      |                |
| H     | 0 | 2.572225    | -0.766236 | -2.173213      |                |
| H     | 0 | 2.283861    | 0.665198  | -1.143380      |                |
| H     | 0 | 3.858305    | -0.157732 | -1.111721      |                |
| C     | 0 | 0.965892    | -1.581861 | -0.165929      |                |
| C     | 0 | -1.827027   | 0.334387  | -1.155778      |                |
| C     | 0 | -2.330714   | -0.176903 | 0.045461       |                |
| C     | 0 | -0.731758   | 1.196270  | -1.168701      |                |
| C     | 0 | -1.695317   | 0.197281  | 1.235073       |                |
| C     | 0 | -0.108960   | 1.590562  | 0.022695       |                |
| H     | 0 | -0.374074   | 1.595830  | -2.114715      |                |
| C     | 0 | -0.601071   | 1.060108  | 1.225177       |                |
| H     | 0 | -2.066272   | -0.186100 | 2.182354       |                |
| O     | 0 | -0.072596   | -1.985153 | -0.284592      |                |
| H     | 0 | -0.145011   | 1.358585  | 2.166954       |                |
| C     | 0 | -3.491599   | -1.137009 | 0.051782       |                |
| H     | 0 | -3.140036   | -2.166984 | -0.077770      |                |
| H     | 0 | -4.038413   | -1.089875 | 0.996263       |                |
| H     | 0 | -4.186281   | -0.921306 | -0.763495      |                |
| C     | 0 | 0.965431    | 2.649632  | 0.024054       |                |
| H     | 0 | 1.755548    | 2.441523  | 0.751780       |                |
| H     | 0 | 1.421159    | 2.762567  | -0.963107      |                |
| H     | 0 | 0.530708    | 3.617457  | 0.295006       |                |
| H     | 0 | -2.300559   | 0.056197  | -2.094123      |                |

**$\eta^1$ - $\pi$ -complex (PCM)**

SCF Done: E(RM062X) = -542.305651141

Zero-point correction= 0.261544  
(Hartree/Particle)  
Thermal correction to Energy= 0.276905  
Thermal correction to Enthalpy= 0.277849  
Thermal correction to Gibbs Free Energy= 0.218216  
Sum of electronic and zero-point Energies= -542.044108  
Sum of electronic and thermal Energies= -542.028746  
Sum of electronic and thermal Enthalpies= -542.027802  
Sum of electronic and thermal Free Energies= -542.087436

|       |   | E (Thermal) |           | CV             | S              |
|-------|---|-------------|-----------|----------------|----------------|
|       |   | KCal/Mol    |           | Cal/Mol-Kelvin | Cal/Mol-Kelvin |
| Total |   | 173.760     |           | 54.929         | 125.509        |
| C     | 0 | -1.060177   | -1.005754 | 1.633253       |                |
| H     | 0 | -0.099484   | -0.821328 | 1.150857       |                |
| H     | 0 | -1.317687   | -0.171903 | 2.286982       |                |
| H     | 0 | -0.997487   | -1.918115 | 2.228440       |                |
| C     | 0 | -2.147495   | -1.266316 | 0.570036       |                |
| H     | 0 | -3.111399   | -1.497939 | 1.050464       |                |
| C     | 0 | -1.772461   | -2.367926 | -0.445736      |                |
| H     | 0 | -2.547917   | -2.514147 | -1.197343      |                |
| H     | 0 | -0.820178   | -2.130397 | -0.922143      |                |
| H     | 0 | -1.662487   | -3.286055 | 0.133540       |                |
| C     | 0 | -2.458240   | -0.042014 | -0.137138      |                |
| C     | 0 | 0.402398    | 0.806905  | -1.161386      |                |
| C     | 0 | 0.469376    | 1.700141  | -0.086285      |                |
| C     | 0 | 1.251478    | -0.301402 | -1.233137      |                |
| C     | 0 | 1.419156    | 1.447871  | 0.912494       |                |
| C     | 0 | 2.191766    | -0.555928 | -0.231856      |                |
| H     | 0 | 1.192859    | -0.964751 | -2.093195      |                |
| C     | 0 | 2.264591    | 0.344613  | 0.839677       |                |
| H     | 0 | 1.503351    | 2.133637  | 1.752156       |                |
| O     | 0 | -2.767991   | 0.891449  | -0.674243      |                |
| H     | 0 | 2.998038    | 0.179718  | 1.625021       |                |
| C     | 0 | -0.423719   | 2.913275  | -0.003659      |                |
| H     | 0 | -1.152527   | 2.815710  | 0.809120       |                |
| H     | 0 | 0.163245    | 3.812850  | 0.200858       |                |
| H     | 0 | -0.970230   | 3.072079  | -0.936379      |                |
| C     | 0 | 3.083755    | -1.769437 | -0.290945      |                |
| H     | 0 | 2.617805    | -2.616105 | 0.225261       |                |
| H     | 0 | 3.269803    | -2.072634 | -1.324136      |                |
| H     | 0 | 4.044892    | -1.577107 | 0.191629       |                |
| H     | 0 | -0.289243   | 1.000728  | -1.979095      |                |

**$\sigma$ -complex (PCM)**

SCF Done: E(RM062X) = -542.297511079

Zero-point correction= 0.261892  
(Hartree/Particle)  
Thermal correction to Energy= 0.276174  
Thermal correction to Enthalpy= 0.277118  
Thermal correction to Gibbs Free Energy= 0.221294  
Sum of electronic and zero-point Energies= -542.035619  
Sum of electronic and thermal Energies= -542.021337  
Sum of electronic and thermal Enthalpies= -542.020393  
Sum of electronic and thermal Free Energies= -542.076217

|       |   | E (Thermal) | CV             | S              |
|-------|---|-------------|----------------|----------------|
|       |   | KCal/Mol    | Cal/Mol-Kelvin | Cal/Mol-Kelvin |
| Total |   | 173.302     | 53.417         | 117.491        |
| C     | 0 | -1.059167   | -0.667686      | 1.854361       |
| H     | 0 | 0.027795    | -0.617616      | 1.742051       |
| H     | 0 | -1.432896   | 0.314510       | 2.156888       |
| H     | 0 | -1.269087   | -1.367923      | 2.666794       |
| C     | 0 | -1.728709   | -1.179351      | 0.579301       |
| H     | 0 | -2.809035   | -1.260379      | 0.735030       |
| C     | 0 | -1.192861   | -2.563265      | 0.180257       |
| H     | 0 | -1.573568   | -2.885598      | -0.792379      |
| H     | 0 | -0.099038   | -2.586158      | 0.163085       |
| H     | 0 | -1.520571   | -3.286396      | 0.931439       |
| C     | 0 | -1.613199   | -0.193047      | -0.568602      |
| C     | 0 | -0.174672   | 0.462418       | -0.887961      |
| C     | 0 | 0.031122    | 1.651203       | -0.035798      |
| C     | 0 | 0.923976    | -0.510489      | -0.969805      |
| C     | 0 | 1.229339    | 1.783797       | 0.640500       |
| C     | 0 | 2.094377    | -0.360818      | -0.277988      |
| H     | 0 | 0.792041    | -1.349337      | -1.649702      |
| C     | 0 | 2.221819    | 0.808947       | 0.517904       |
| H     | 0 | 1.411735    | 2.657056       | 1.257507       |
| O     | 0 | -2.539545   | 0.155107       | -1.244638      |
| H     | 0 | 3.156676    | 0.959788       | 1.054611       |
| C     | 0 | -1.045118   | 2.678516       | 0.059100       |
| H     | 0 | -1.889687   | 2.284571       | 0.638740       |
| H     | 0 | -0.681653   | 3.579091       | 0.553217       |
| H     | 0 | -1.435777   | 2.930549       | -0.930477      |
| C     | 0 | 3.223497    | -1.349314      | -0.351902      |
| H     | 0 | 3.399279    | -1.795800      | 0.630916       |
| H     | 0 | 2.997964    | -2.148170      | -1.059459      |
| H     | 0 | 4.147442    | -0.855947      | -0.664782      |
| H     | 0 | -0.367692   | 0.821437       | -1.912574      |

**xylene (PCM)**

SCF Done: E(RM062X) = -310.752383911

|                                              |             |
|----------------------------------------------|-------------|
| Zero-point correction=                       | 0.155811    |
| (Hartree/Particle)                           |             |
| Thermal correction to Energy=                | 0.162175    |
| Thermal correction to Enthalpy=              | 0.163119    |
| Thermal correction to Gibbs Free Energy=     | 0.125415    |
| Sum of electronic and zero-point Energies=   | -310.596582 |
| Sum of electronic and thermal Energies=      | -310.590217 |
| Sum of electronic and thermal Enthalpies=    | -310.589273 |
| Sum of electronic and thermal Free Energies= | -310.626977 |

|       |   | E (Thermal) |           | CV             | S              |
|-------|---|-------------|-----------|----------------|----------------|
|       |   | KCal/Mol    |           | Cal/Mol-Kelvin | Cal/Mol-Kelvin |
| Total |   | 101.766     |           | 25.316         | 79.354         |
| C     | 0 | -1.418438   | 0.002131  | 0.012453       |                |
| C     | 0 | -0.695454   | -1.195322 | 0.007202       |                |
| C     | 0 | 0.695455    | -1.195323 | -0.007234      |                |
| C     | 0 | 1.418439    | 0.002129  | -0.012473      |                |
| C     | 0 | 0.696641    | 1.197518  | -0.007422      |                |
| C     | 0 | -0.696639   | 1.197519  | 0.007389       |                |
| H     | 0 | -1.234554   | -2.142725 | 0.012735       |                |
| H     | 0 | 1.234555    | -2.142726 | -0.012730      |                |
| H     | 0 | 1.235009    | 2.145144  | -0.013293      |                |
| H     | 0 | -1.235003   | 2.145148  | 0.013298       |                |
| C     | 0 | 2.918648    | -0.002194 | 0.004443       |                |
| H     | 0 | 3.305466    | -0.146250 | 1.021578       |                |
| H     | 0 | 3.324633    | -0.813050 | -0.610955      |                |
| H     | 0 | 3.325747    | 0.944092  | -0.367855      |                |
| C     | 0 | -2.918650   | -0.002194 | -0.004395      |                |
| H     | 0 | -3.325727   | 0.944057  | 0.368023       |                |
| H     | 0 | -3.305542   | -0.146151 | -1.021515      |                |
| H     | 0 | -3.324594   | -0.813117 | 0.610938       |                |
